# Supplementary material for: Expression of calcium pumps is differentially regulated by histone deacetylase inhibitors and estrogen receptor alpha in breast cancer cells
Source: PubMed Central journal article supplement (PMC6199715; doi:10.1186/s12885-018-4945-x), 2018-10-23
Supplement: 12885_2018_4945_MOESM1_ESM.pdf [file 12885_2018_4945_MOESM1_ESM.pdf]

**Table S1:** Breast cancer cell lines and their characteristics used in this study [2, 3, 30-32].

| Cell line             |      | MCF-10A                                     | MCF-7                                                                                       | T-47D                     | ZR-75-1                   | BT-474                                                            | AU-565                                                                            | SK-BR-3                   | MDA-MB-468                                                                                                           | BT-549                                                                                                                             | MDA-MB-231                  | Hs578T                      |
|-----------------------|------|---------------------------------------------|---------------------------------------------------------------------------------------------|---------------------------|---------------------------|-------------------------------------------------------------------|-----------------------------------------------------------------------------------|---------------------------|----------------------------------------------------------------------------------------------------------------------|------------------------------------------------------------------------------------------------------------------------------------|-----------------------------|-----------------------------|
| Tumor type            |      | non-tumorigenic breast epithelial cell line | invasive ductal carcinoma                                                                   | invasive ductal carcinoma | invasive ductal carcinoma | invasive ductal carcinoma                                         | metastatic adenocarcinoma                                                         | metastatic adenocarcinoma | metastatic adenocarcinoma                                                                                            | invasive ductal carcinoma                                                                                                          | metastatic adenocarcinoma   | invasive ductal carcinoma   |
| Intrinsic subtype     |      |                                             | Luminal A                                                                                   |                           |                           | Luminal B                                                         | HER2                                                                              |                           | Basal                                                                                                                | Basal/Claudin-low                                                                                                                  |                             |                             |
| TNBC subtype          |      |                                             |                                                                                             |                           |                           |                                                                   |                                                                                   |                           | BL1 (basal-like 1)                                                                                                   | M (mesenchymal)                                                                                                                    | MSL (mesenchymal stem-like) | MSL (mesenchymal stem-like) |
| IHC markers           | ER   | -                                           | +                                                                                           | +                         | +                         | +/-                                                               | -                                                                                 | -                         | -                                                                                                                    | -                                                                                                                                  | -                           | -                           |
|                       | PR   | -                                           | +                                                                                           | +                         | +/-                       | +                                                                 | -                                                                                 | -                         | -                                                                                                                    | -                                                                                                                                  | -                           | -                           |
|                       | HER2 | -                                           | -                                                                                           | -                         | -                         | +                                                                 | +                                                                                 | +                         | -                                                                                                                    | -                                                                                                                                  | -                           | -                           |
| Histologic grade      |      |                                             | Low                                                                                         |                           |                           | Intermediate/Low                                                  | High                                                                              |                           | High                                                                                                                 | High                                                                                                                               |                             |                             |
| Prognosis             |      |                                             | Excelent                                                                                    |                           |                           | Intermediate/Bad                                                  | Bad                                                                               |                           | Bad                                                                                                                  | Bad                                                                                                                                |                             |                             |
| Other characteristics |      |                                             | Ki67 low; better differentiated tumors; endocrine responsive, often chemotherapy responsive |                           |                           | Ki67 high; usually endocrine responsive, variable to chemotherapy | Ki67 high; usually responsive to HER2-targeted therapies, chemotherapy responsive |                           | EGFR+ and/or cytokeratin 5/6+; Ki67 high; aggressive and poorly differentiated tumors; often chemotherapy responsive | E-cadherin, claudin-3, -4 and -7 low; Ki67 low; aggressive and poorly differentiated tumors; intermediate response to chemotherapy |                             |                             |
| Mutations             |      | CDKN2A/B                                    | CDKN2A, PIK3CA                                                                              | PIK3CA, TP53              | PTEN                      | PIK3CA, TP53                                                      | TP53                                                                              | TP53                      | PTEN, RB1, SMAD4, TP53                                                                                               | PTEN, RB1, TP53                                                                                                                    | BRAF, CDKN2A, KRAS, TP53    | HRAS, CDKN2A, TP53          |
